# Supplementary material
Source: Springer Nature journal article supplement (https://www.springermedizin.de/resource/supplementary/12889_2010_2793_MOESM1_ESM.pdf/9489282)

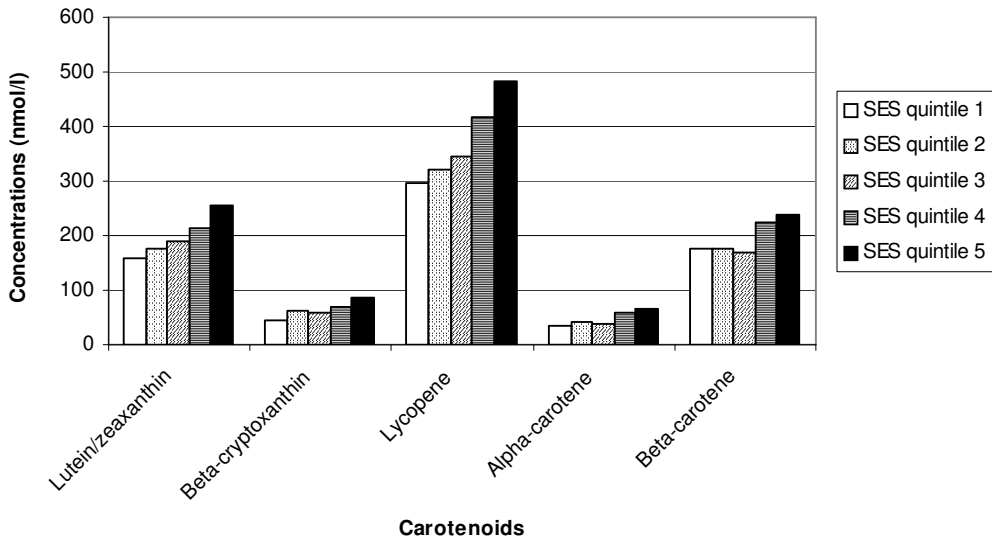

Supplement: MOESM1 [file 9489282]
